# Supplementary material for: Chronocoulometric method for the evaluation of antioxidant capacity of medicinal plant tinctures
Source: Royal Society of Chemistry journal article supplement (doi:10.1039/c8ay01907j), 2018-01-01
Supplement: c8ay01907j1.pdf [file c8ay01907j1.pdf]

## Electronic Supplementary Material

### Chronocoulometric method for the evaluation of medicinal plants tinctures antioxidant capacity

Guzel Ziyatdinova, Ekaterina Kozlova, Evgeniya Morozova, Herman Budnikov

Analytical Chemistry Department, A.M. Butlerov Institute of Chemistry, Kazan Federal

University, Kremlyevskaya 18, 420008 Kazan, Russian Federation, Ziyatdinovag@mail.ru

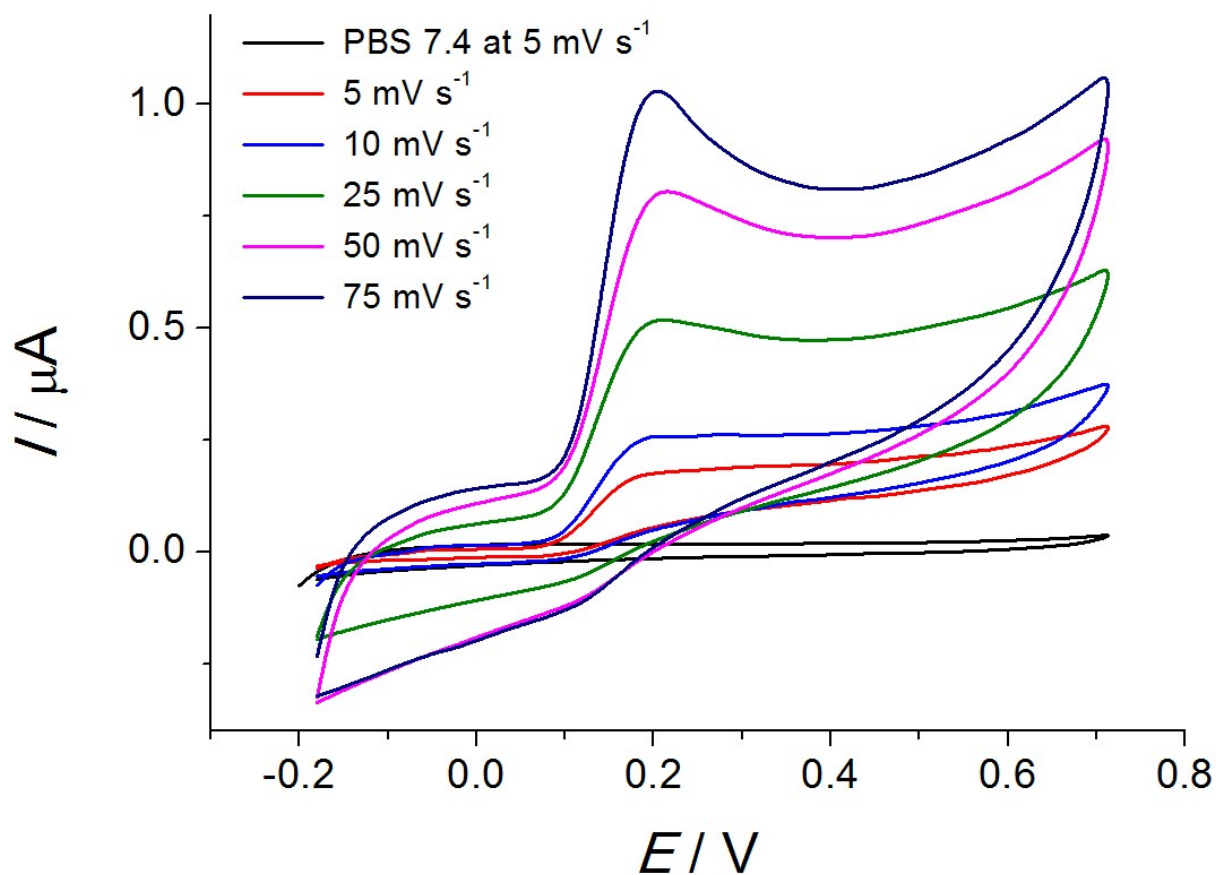

**Fig. S1** Cyclic voltammograms of 25 µL *Paeonia anomala* L. on PGA/MWNT/GCE in phosphate buffer solution pH 7.4 at different potential scan rate.
